# Supplementary material for: Fostering Prevention of Cervical Cancer by a Correct Diagnosis of Precursors: A Structured Case-Based Colposcopy Course in Finland, Norway and UK
Source: MDPI journal article supplement (doi:10.3390/cancers12113201), 2020-10-30
Supplement: s1 [file s1]

**ColpoEdu 2015 picture test**

Each picture will be shown 30 seconds. For each picture choose the appropriate junction type and diagnosis.

Also mark on the VAS scale how confident you feel about your answer.

This is ☐ pre-test

☐ post-test

**Picture 1.**

SCI type      T1   T2   T3

Diagnosis

- a) normal
- b) CIN 1
- c) CIN 2
- d) CIN 3
- e) microinvasive squamous cancer
- f) SCC (squamous cell carcinoma)
- g) CGIN (glandular atypia)
- h) Adeno carcinoma

How confident do you feel about your answer?

I-----I

not at all confident

very confident

**Picture 2.**

SCI type      T1   T2   T3

Diagnosis

- a) normal
- b) CIN 1
- c) CIN 2
- d) CIN 3
- e) microinvasive squamous cancer
- f) SCC (squamous cell carcinoma)
- g) CGIN (glandular atypia)
- h) Adeno carcinoma

How confident do you feel about your answer?

I-----I

not at all confident

very confident

**Picture 3.**

SCI type      T1   T2   T3

Diagnosis

- a) normal
- b) CIN 1
- c) CIN 2
- d) CIN 3

- e) microinvasive squamous cancer
- f) SCC (squamous cell carcinoma)
- g) CGIN (glandular atypia)
- h) Adeno carcinoma

How confident do you feel about your answer?

I-----I

not at all confident                      very confident

**Picture 4.**

SCI type            T1    T2    T3

Diagnosis

- a) normal
- b) CIN 1
- c) CIN 2
- d) CIN 3
- e) microinvasive squamous cancer
- f) SCC (squamous cell carcinoma)
- g) CGIN (glandular atypia)
- h) Adeno carcinoma

How confident do you feel about your answer?

I-----I

not at all confident                      very confident

**Picture 5.**

SCI type            T1    T2    T3

Diagnosis

- a) normal
- b) CIN 1
- c) CIN 2
- d) CIN 3
- e) microinvasive squamous cancer
- f) SCC (squamous cell carcinoma)
- g) CGIN (glandular atypia)
- h) Adeno carcinoma

How confident do you feel about your answer?

I-----I

not at all confident                      very confident

**Picture 6.**

SCI type            T1    T2    T3

Diagnosis

- a) normal
- b) CIN 1
- c) CIN 2
- d) CIN 3
- e) microinvasive squamous cancer

f) SCC (scuamous cell carcinoma)

g) CGIN (glandular atypia)

h) Adeno carcinoma

How confident do you feel about your answer?

I-----I

not at all confident

very confident

**Picture 7.**

SCI type      T1   T2   T3

Diagnosis

a) normal

b) CIN 1

c) CIN 2

d) CIN 3

e) microinvasive squamous cancer

f) SCC (scuamous cell carcinoma)

g) CGIN (glandular atypia)

h) Adeno carcinoma

How confident do you feel about your answer?

I-----I

not at all confident

very confident

**Picture 8.**

SCI type      T1   T2   T3

Diagnosis

a) normal

b) CIN 1

c) CIN 2

d) CIN 3

e) microinvasive squamous cancer

f) SCC (scuamous cell carcinoma)

g) CGIN (glandular atypia)

h) Adeno carcinoma

How confident do you feel about your answer?

I-----I

not at all confident

very confident

**Picture 9.**

SCI type      T1   T2   T3

Diagnosis

a) normal

b) CIN 1

c) CIN 2

d) CIN 3

e) microinvasive squamous cancer

f) SCC (scuamous cell carcinoma)

g) CGIN (glandular atypia)

h) Adeno carcinoma

How confident do you feel about your answer?

I-----I

not at all confident

very confident

**Picture 10.**

SCI type      T1   T2   T3

Diagnosis

a) normal

b) CIN 1

c) CIN 2

d) CIN 3

e) microinvasive squamous cancer

f) SCC (squamous cell carcinoma)

g) CGIN (glandular atypia)

h) Adeno carcinoma

How confident do you feel about your answer?

I-----I

not at all confident

very confident

**Thank you for your participation!**
