# Supplementary material for: Fostering Prevention of Cervical Cancer by a Correct Diagnosis of Precursors: A Structured Case-Based Colposcopy Course in Finland, Norway and UK
Source: Cancers (Basel). 2020 Oct 30;12(11):3201. doi: 10.3390/cancers12113201 (PMC7692698; doi:10.3390/cancers12113201)
Supplement: Supplementary file 1 [file cancers-12-03201-s001.zip]

Archive with 6 entries (6 files):
- cancers-953396-supplementary file 1.docx
- cancers-953396-supplementary file 1.pdf
- cancers-953396-supplementary file 2.docx
- cancers-953396-supplementary file 2.pdf
- cancers-953396-supplementary file 3.docx
- cancers-953396-supplementary file 3.pdf
